# Supplementary material for: Hydrophilic Astragalin Galactoside Induces T Helper Type 1-Mediated Immune Responses via Dendritic Cells
Source: MDPI journal article supplement (doi:10.3390/ijms19103120), 2018-10-11
Supplement: s1 [file s1]

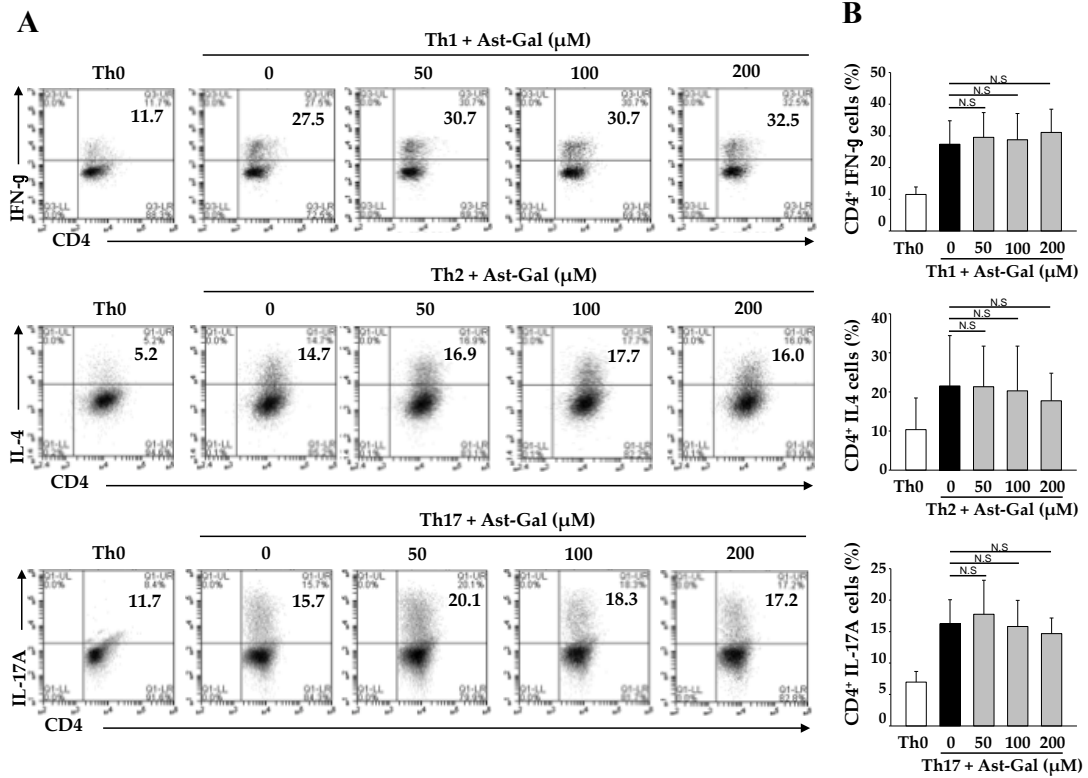

**Figure S1.** Ast-Gal does not directly affect the differentiation of CD4<sup>+</sup> T cells. Naïve CD4<sup>+</sup> T cells were isolated from C57BL/6 mice and stimulated with anti-CD3 and CD28 mAbs under each Th subset-polarizing condition in the absence or presence of various concentrations of Ast-Gal (0, 50, 100, or 200  $\mu\text{M}$ ). **(A)** After 2 or 3 days of incubation, the percentages of cytokine-producing T cell populations was determined by flow cytometric analysis using mAbs for IFN- $\gamma$ , IL-4, IL-13, and IL-17. **(B)** The results from (A) are summarized as mean  $\pm$  SD from three independent experiments.
